# Supplementary material for: Effects of sample surface morphology on laser-induced breakdown spectroscopy
Source: Royal Society of Chemistry journal article supplement (doi:10.1039/d2ja00101b), 2022-01-01
Supplement: d2ja00101b1.pdf [file d2ja00101b1.pdf]

Table S1: RSD of spectral data in experiment I.

| $\theta$ | RSD/%           |                 |                 |
|----------|-----------------|-----------------|-----------------|
|          | Fe I 305.9067nm | Cr I 322.2318nm | Ti I 383.3911nm |
| -20      | 4.964           | 6.162           | 3.438           |
| -19      | 4.512           | 5.124           | 2.808           |
| -18      | 3.908           | 5.878           | 4.037           |
| -17      | 3.124           | 4.512           | 2.561           |
| -16      | 3.759           | 4.350           | 2.909           |
| -15      | 3.125           | 4.511           | 2.565           |
| -14      | 2.890           | 4.408           | 2.428           |
| -13      | 3.750           | 4.652           | 2.656           |
| -12      | 2.904           | 3.251           | 2.226           |
| -11      | 3.452           | 4.856           | 2.558           |
| -10      | 3.746           | 5.201           | 2.728           |
| -9       | 2.945           | 5.235           | 2.455           |
| -8       | 3.045           | 3.815           | 2.770           |
| -7       | 3.124           | 3.998           | 2.845           |
| -6       | 3.458           | 4.192           | 2.737           |
| -5       | 3.521           | 4.215           | 2.412           |
| -4       | 3.155           | 4.409           | 3.181           |
| -3       | 4.012           | 4.512           | 2.512           |
| -2       | 3.458           | 4.854           | 2.458           |
| -1       | 3.852           | 4.510           | 2.321           |
| 0        | 3.155           | 4.597           | 2.485           |
| 1        | 2.932           | 5.211           | 2.103           |
| 2        | 2.912           | 5.365           | 2.137           |
| 3        | 3.152           | 5.332           | 2.457           |
| 4        | 3.154           | 4.332           | 2.545           |
| 5        | 3.784           | 4.199           | 3.124           |
| 6        | 3.152           | 4.852           | 4.281           |
| 7        | 3.456           | 4.001           | 2.451           |
| 8        | 3.485           | 4.154           | 2.548           |
| 9        | 3.454           | 4.121           | 2.954           |
| 10       | 3.471           | 5.125           | 3.101           |
| 11       | 3.212           | 4.032           | 3.121           |
| 12       | 4.215           | 4.112           | 3.512           |
| 13       | 4.521           | 3.996           | 3.011           |
| 14       | 4.987           | 3.954           | 2.312           |
| 15       | 3.401           | 4.023           | 2.302           |
| 16       | 4.123           | 5.121           | 2.754           |
| 17       | 3.913           | 4.060           | 3.445           |
| 18       | 3.845           | 4.834           | 3.012           |
| 19       | 3.905           | 4.662           | 2.121           |
| 20       | 3.154           | 4.521           | 2.421           |

Table S2: RSD of spectral data in experiment II.

| Ra/ $\mu\text{m}$ | RSD/%           |                  |                 |
|-------------------|-----------------|------------------|-----------------|
|                   | Fe I 305.9067nm | Cr I 344.1104 nm | Ti I 383.3911nm |
| 0.448             | 8.46            | 6.48             | 6.53            |
| 0.388             | 6.35            | 4.76             | 5.24            |
| 0.308             | 8.38            | 3.98             | 5.36            |
| 0.216             | 9.11            | 7.04             | 6.52            |
| 0.172             | 8.29            | 5.06             | 6.05            |
| 0.147             | 11.00           | 6.01             | 7.56            |
| 0.133             | 8.59            | 4.74             | 7.32            |
| 0.121             | 8.41            | 6.30             | 7.21            |
